# Supplementary material
Source: PubMed Central journal article supplement (PMC7497526)
Supplement: bm0c00812_si_001.pdf [file bm0c00812_si_001.pdf]

## Supporting information

### **Nanoparticles presenting potent TLR 7/8 agonists enhance anti-PD-L1 immunotherapy in cancer treatment**

Anton A. A. Smith,<sup>†,‡</sup> Emily C. Gale,<sup>⊥,‡</sup> Gillie A. Roth,<sup>‡</sup> Caitlin L. Maikawa,<sup>‡</sup> Santiago Correa,<sup>†</sup> Anthony C. Yu,<sup>†</sup> and Eric A. Appel<sup>†,‡,\*</sup>

<sup>†</sup> Department of Materials Science & Engineering, Stanford University, Stanford, CA 94305, United States

<sup>⊥</sup> Department of Biochemistry, Stanford University School of Medicine, Stanford, CA 94305, United States

<sup>‡</sup> Department of Bioengineering, Stanford University, Stanford, CA 94305, United States

<sup>\*</sup> Authors contributed equally to this work.

**Synthesis of N-(4-((4-amino-2-(ethoxymethyl)-1H-imidazo[4,5-c]quinolin-1-yl)methyl)benzyl)-3-(prop-2-yn-1-yloxy)propanamide (III).** The Benzyl amine TLR 7/8 agonist was synthesized as described by Shukla *et. al*,<sup>1</sup> with a modification of the final aromatic substitution and tert-butyl carbamate removal on tert-butyl (4-((4-chloro-2-(ethoxymethyl)-1H-imidazo[4,5-c]quinolin-1-yl)methyl)benzyl)carbamate (I), which was done as a one-pot Staudinger-type reaction.<sup>2</sup>

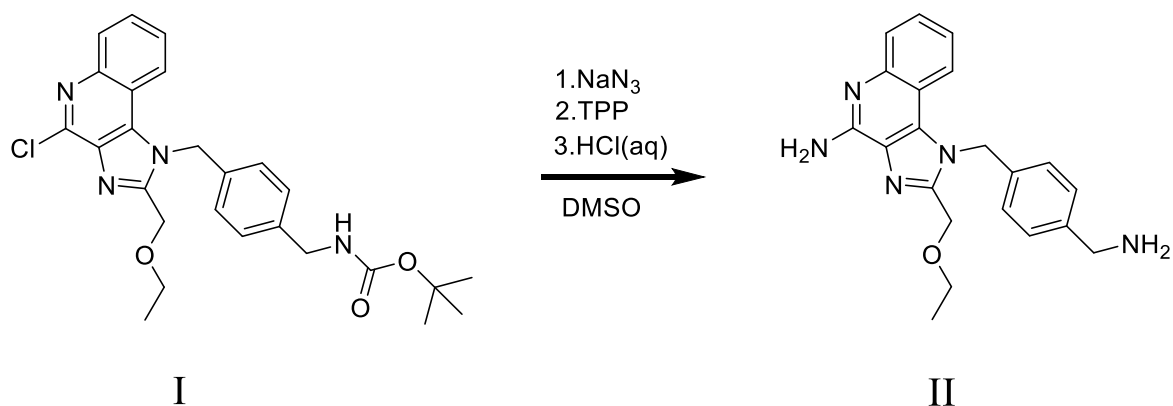

Compound I and 2 equivalents of NaN<sub>3</sub> (68 mg, 1.04 mmol) were dissolved in 1.5 mL DMSO, and was heated to 90° C for 2 hours. Triphenylphosphine (2 eq, 273 mg, 1.04 mmol) was added, the temperature was increased to 120° C and the reaction mixture was stirred for 16 hours. 0.5 mL 4M HCl (aq) was added and the temperature was lowered to 95° C for 3 hours. 4 mL of water was added at which a precipitate formed, and the mixture was washed with EtOAc. Na<sub>2</sub>CO<sub>3</sub> (sat) was added to the aqueous phase which was extracted with EtOAc. The combined EtOAc was dried with Na<sub>2</sub>SO<sub>4</sub> and the solvent removed *in vacuo* to yield a crude solid. This was purified by silica column chromatography on a biotage isolera system, using a gradient of DCM:MeOH, with 1% trimethylamine in the MeOH. This yielded compound II (1-(4-(aminomethyl)benzyl)-2-(ethoxymethyl)-1H-imidazo[4,5-c]quinolin-4-amine) (60 mg, 0.16 mmol, 32% yield).

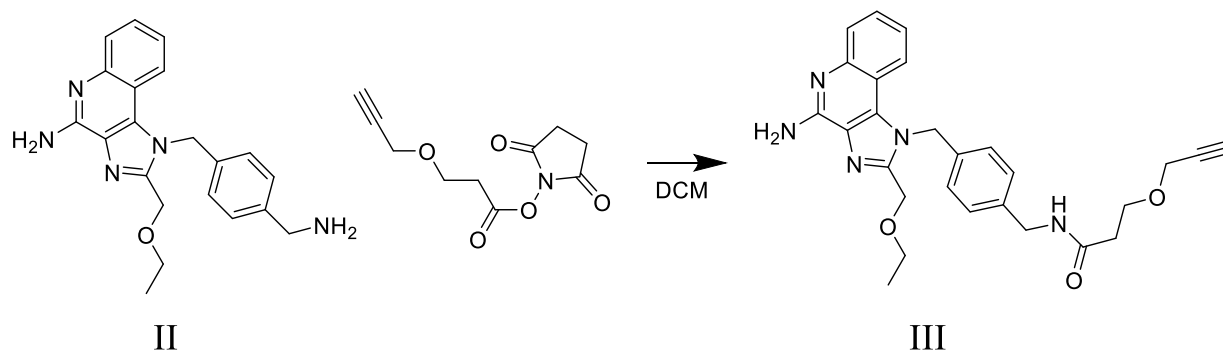

Compound **II** (25 mg, 69  $\mu\text{mol}$ ) and propargyl-N-hydroxysuccinimidyl ester (17 mg, 76  $\mu\text{mol}$ ) were dissolved in 1 mL anhydrous DCM, and stirred for 2 hours at room temperature. The reaction mixture was loaded onto a silica column, and the product was purified using a DCM:MeOH gradient. This yielded compound **III**, N-(4-((4-amino-2-(ethoxymethyl)-1H-imidazo[4,5-c]quinolin-1-yl)methyl)benzyl)-3-(prop-2-yn-1-yloxy)propanamide (25 mg, 53  $\mu\text{mol}$ , 76% yield).

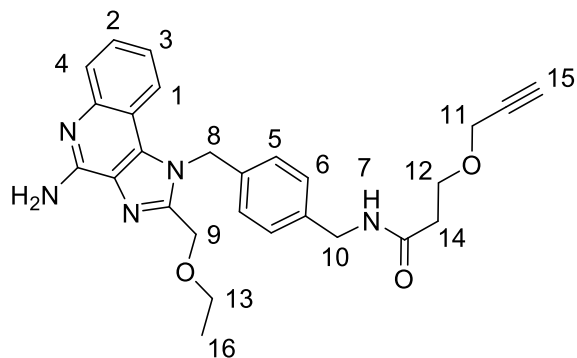

$^1\text{H}$  NMR (300 MHz,  $\text{CDCl}_3$ -*d*)  $\delta$  8.05 (d,  $J$  = 8.4 Hz, 1H, H1), 7.73 (d,  $J$  = 8.3 Hz, 1H, H2), 7.58 (t,  $J$  = 7.9 Hz, 1H, H3), 7.29 (3H, H4, H5), 7.02 (d,  $J$  = 7.9 Hz, 2H, H6), 6.43 (s, 1H, H7), 5.91 (s, 2H, H8), 4.78 (s, 2, H9), 4.46 (d,  $J$  = 5.9 Hz, 2H, H10), 4.15 (d,  $J$  = 2.4 Hz, 2H, H11), 3.82 (t,  $J$  = 5.7 Hz, 2H, H12), 3.58 (q,  $J$  = 7.2 Hz, 2H, H13), 2.55 (t,  $J$  = 5.7 Hz, 2H, H14), 2.36 (t,  $J$  = 2.4 Hz, 1H, H15), 1.14 (t,  $J$  = 7.2 Hz, 3H, H16).

$^{13}\text{C}$  NMR (75 MHz,  $\text{CDCl}_3$ )  $\delta$  171.35, 166.55, 151.77, 150.14, 138.70, 136.66, 136.09, 133.40, 129.84, 128.43, 125.71, 124.66, 121.24, 120.73, 112.79, 79.06, 75.01, 66.77, 66.02, 64.19, 58.44, 58.38, 58.21, 36.88, 31.89, 14.86. HRMS (ESI) calcd. for  $\text{C}_{27}\text{H}_{29}\text{N}_5\text{O}_3+\text{H}^+$ : 472.2343; found 472.2335.

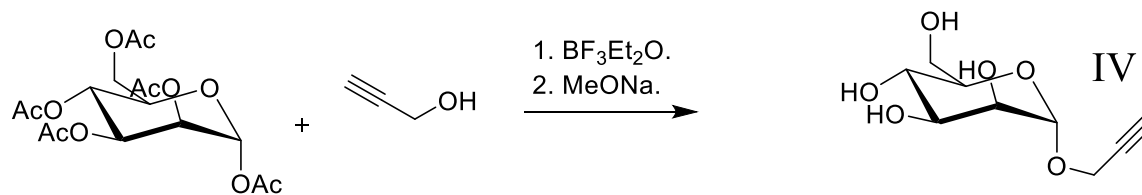

**Synthesis of 1'-O-propargyl- $\alpha$ -Mannose (IV).** Alkynated mannose was synthesized as described elsewhere.<sup>3</sup>  $\alpha$ -Mannose pentaacetate (1.95 g, 5 mmol) and propargyl alcohol (0.34 g, 0.35 mL, 6.3 mmol) were dissolved in dry DCM (44mL) while stirring.  $\text{BF}_3\text{Et}_2\text{O}$  (9.3  $\mu\text{L}$ , 8 mg, 0.06 mmol) was added at  $0^\circ\text{C}$ , and the mixture was stirred for 16h. The solution was washed with 1M NaOH, and 50 mL EtOAc was added, and the organic phase was washed with brine and dried over  $\text{Na}_2\text{SO}_4$ . The solution was reduced to approximately 5 mL *in vacuo*, and diluted with 5 mL hexanes, and purified by silica chromatography with a EtOAc:Hexanes gradient. The product was dissolved in dry MeOH, and 100  $\mu\text{L}$  2% NaOMe in MeOH was added. The solution was left for one hour, quenched with a drop of acetic acid, and volatiles removed *in vacuo* to yield IV.

**General synthesis of  $\text{N}_3$ -PEG-PLA and MeO-PEG-PLA.** PEG-PLA was prepared as previously reported.<sup>4</sup> In short, 0.500 g  $\text{N}_3$ -PEG<sub>(114)</sub>-OH or MeO-PEG<sub>(114)</sub>-OH in dry DCM (2 mL) with equimolar 1,8-Diazabicyclo[5.4.0]undec-7-ene (15  $\mu\text{L}$ , 15 mg, 0.1 mmol) was rapidly added to a solution of 2.0 g D,L-lactide in 8 mL dry DCM. The mixture was stirred for 8 min, and quenched with the addition of 1 mL acetone with 200  $\mu\text{L}$  acetic acid. The solution was precipitated into 35 mL of a 1:1 mixture of hexanes and diethyl ether in a 50 mL centrifuge tube. The supernatant was discarded, and 35 mL diethyl ether was added to fully precipitate the polymer. This was dissolved in a minimal amount of ethyl acetate, and 35 mL diethyl ether was added to re-precipitate the polymer, 21kDa,  $\bar{M}_w=1.16$  by PEG standards.  $^1\text{H-NMR}$  showed a PLA block of 20.5 kDa DP=287, calculated from PEG signals (5kDa, DP=114).

**General synthesis of TLR7/8a-PEG-PLA and Mannose-PEG-PLA conjugates.** Conjugations were performed analogous to the procedure previously reported.<sup>4</sup> A 20 mL scintillation vial was charged with **III** or **IV** (1.5 eq) and azido poly(ethylene oxide)-*b*-poly(D,L-lactide) 5kDa-20kDa (0.5 g, 20  $\mu$ mol) was dissolved in 4 mL of NMP and sparged with nitrogen for 10 min. 0.1 mL of a degassed solution of CuBr (3.7 mg/mL) and THPTA (16 mg/mL) was added. The reaction mixture was further sparged with nitrogen for 10 min. The reaction mixture is incubated for 16h at room temperature and precipitated into diethyl ether in a 50 mL centrifuge tube to recover the polymer. The polymer was then dissolved in ethyl acetate and precipitated into diethyl ether, and dried in vacuo.

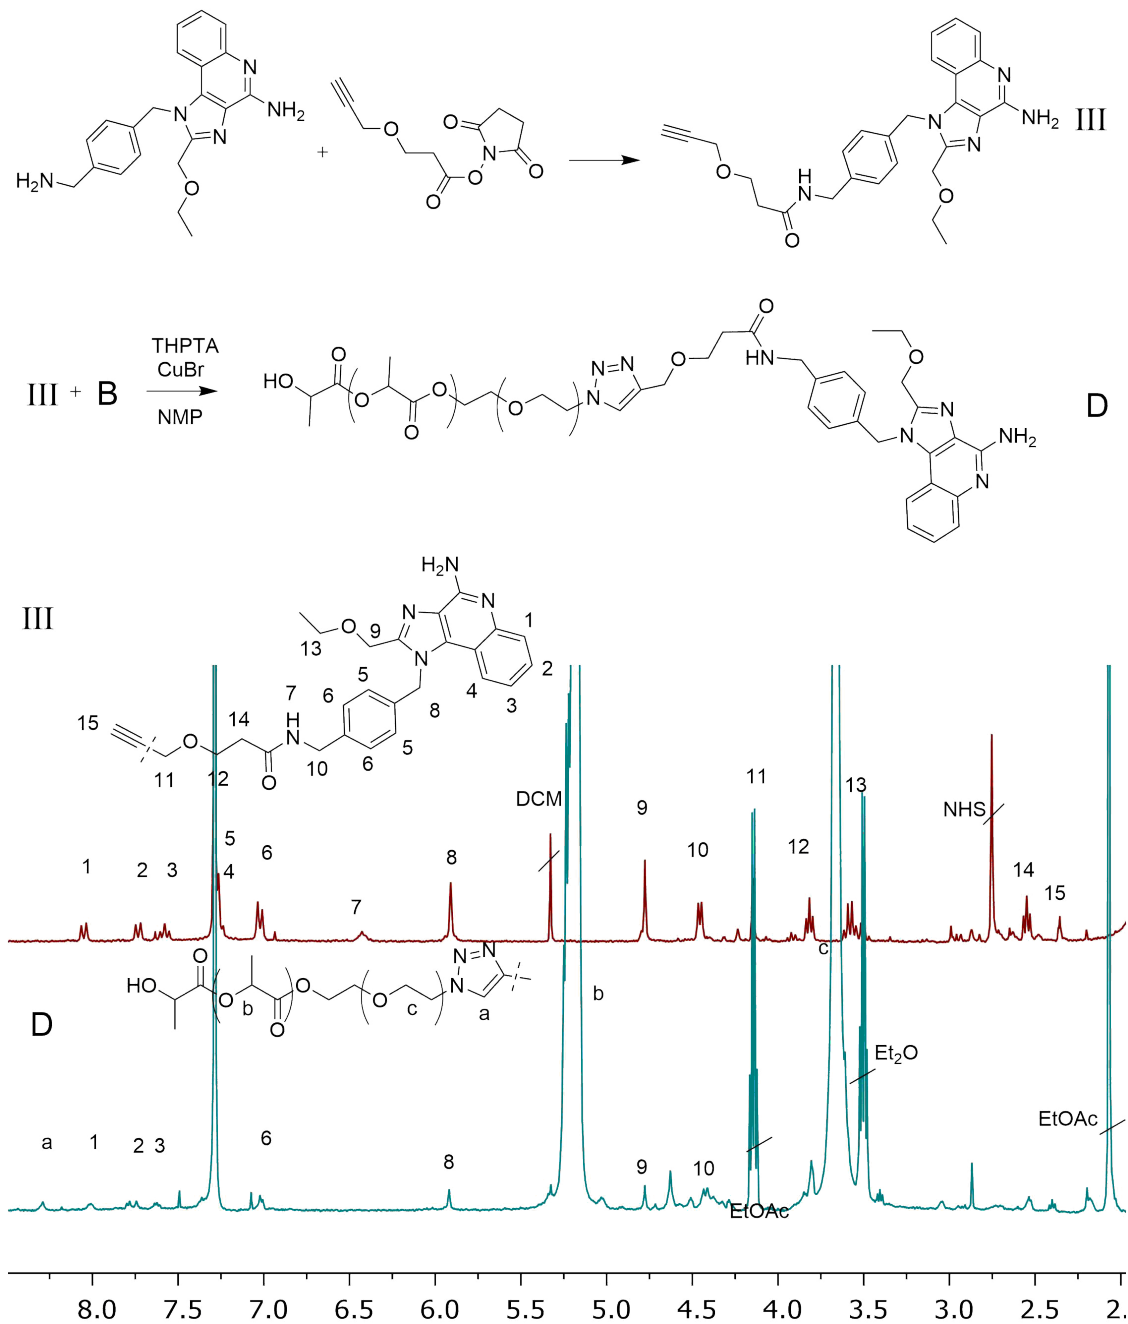

**Figure S1:** Stacked <sup>1</sup>H-NMR (CDCl<sub>3</sub>) of **III** and TLR7/8a-PEG-PLA conjugate.

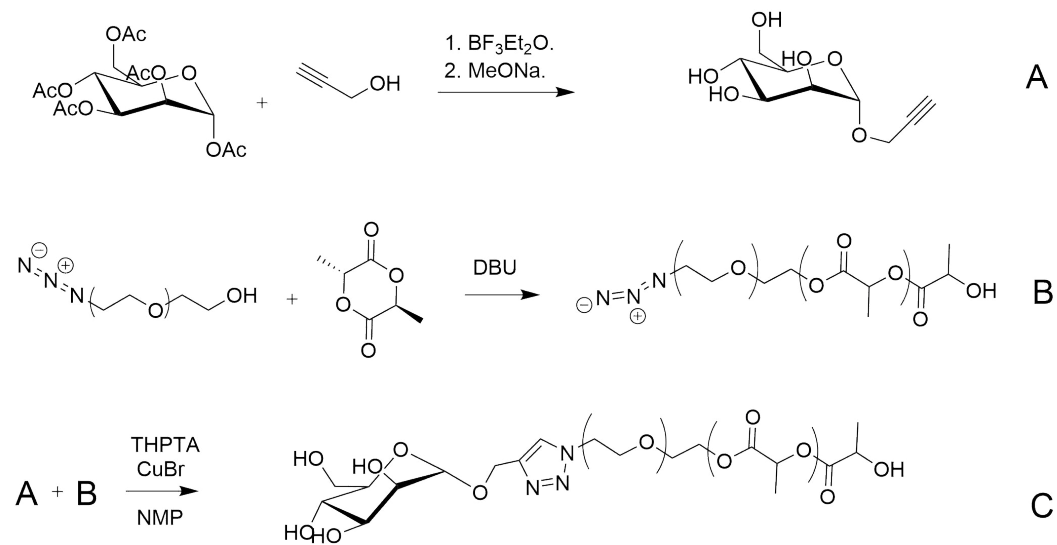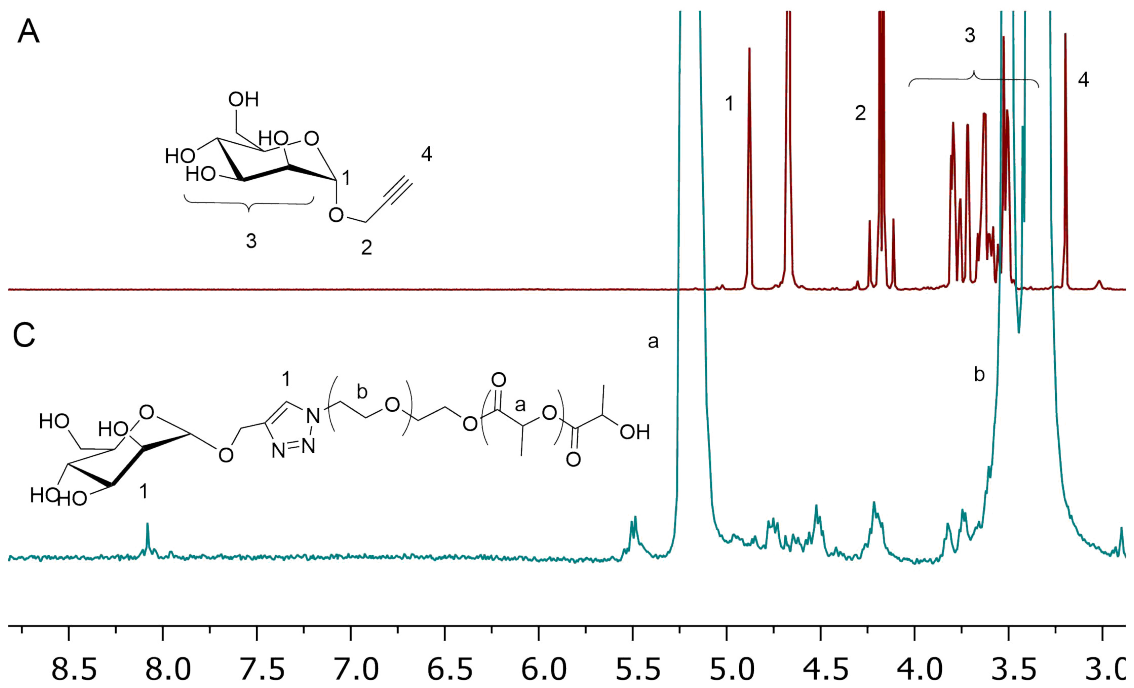

**Figure S2:** Stacked  $^1\text{H-NMR}$  of **IV** ( $\text{D}_2\text{O}$ ) and Mannose-PEG-PLA conjugate ( $\text{d}_6\text{-DMSO}$ ).

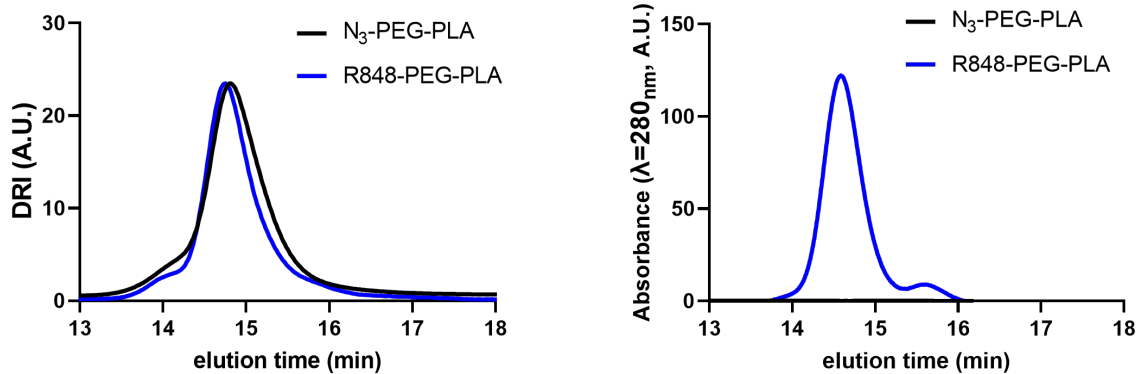

**Figure S3:** TLR7/8a conjugation to PEG-PLA confirmed by SEC. UV-SEC traces of N<sub>3</sub>-PEG-PLA and TLR7/8-PEG-PLA was compared with UV absorbance normalized to the RI peak intensities. TLR7/8-PEG-PLA shows strong UV absorption at 280 nm, with no absorption from N<sub>3</sub>-PEG-PLA.



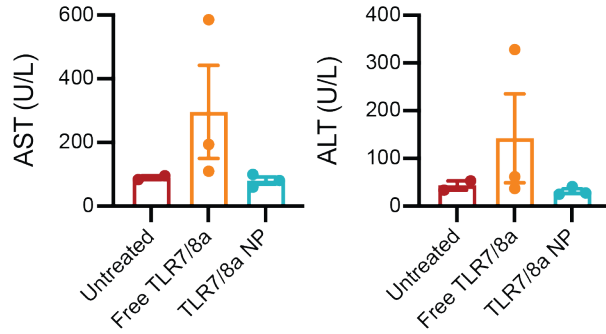

**Figure S4:** Liver enzymes AST and ALT in serum from mice treated 4 times with either free TLR7/8a or TLR7/8a NPs (n=3). Treatment with TLR7/8a NPs led to similarly low levels of both AST and ALT as was seen in serum samples from the control untreated mice (n=2). Treatment with free TLR7/8a led to higher and more varied quantities of liver enzymes compared to the control.

**Table S1.** Composition of different nanoparticles tested.

| NP Treatment                | PEG-PLA (%) | TLR7/8a-PEG-PLA (%) | Mannose-PEGPLA (%) |
|-----------------------------|-------------|---------------------|--------------------|
| High Valency NP             | 50          | 50                  |                    |
| Medium Valency NP           | 75          | 25                  |                    |
| Low Valency NP              | 90          | 10                  |                    |
| High Mannose                | 30          | 20                  | 50                 |
| Low Mannose                 | 60          | 20                  | 20                 |
| High Valency/High Mannose   |             | 50                  | 50                 |
| Medium Valency/High Mannose | 25          | 25                  | 50                 |

**Table S2.** NP size by composition and precipitation solvent

| Ratio TLR7/8a - PEGPLA/PEGPLA | Diameter (nm) | S   | PDI      | S        |
|-------------------------------|---------------|-----|----------|----------|
| 50/50                         | 39.2          | 0.4 | 1.51E-01 | 4.43E-02 |
| 25/75                         | 34.9          | 0.4 | 7.81E-02 | 2.81E-02 |
| 10/90                         | 33.1          | 0.4 | 8.62E-02 | 1.90E-02 |
| 0/100                         | 31.1          | 0.3 | 5.46E-02 | 1.52E-01 |

100% AcCN

| Ratio TLR7/8a - PEGPLA/PEGPLA | Diameter (nm) | S   | PDI      | S        |
|-------------------------------|---------------|-----|----------|----------|
| 50/50                         | 38.9          | 0.3 | 1.43E-01 | 2.96E-02 |
| 25/75                         | 34.8          | 0.4 | 8.80E-02 | 4.08E-02 |
| 10/90                         | 32.7          | 0.3 | 6.97E-02 | 3.50E-02 |

1:2 DMSO:AcCN

| NP type      | Diameter (nm) | S   | PDI      | S        |
|--------------|---------------|-----|----------|----------|
| High Mannose | 38.6          | 0.3 | 8.47E-02 | 2.19E-02 |
| Med Mannose  | 51.5          | 0.4 | 1.64E-01 | 2.34E-02 |
| Low Mannose  | 43.5          | 0.2 | 9.27E-02 | 3.23E-04 |

**Table S3.** NP size and PDI by DLS

| <b>Ratio TLR7/8a -<br/>PEGPLA/PEGPLA</b> | <b>Diameter (nm)</b> | <b>PDI</b> |
|------------------------------------------|----------------------|------------|
| 50/50                                    | 39.5                 | 1.36E-01   |
| 25/75                                    | 33.7                 | 1.07E-01   |
| 10/90                                    | 31.7                 | 5.24E-02   |
| 0/100                                    | 30.3                 | 8.56E-02   |

| <b>Ratio TLR7/8a -<br/>PEGPLA/PEGPLA</b> | <b>Zeta Potential<br/>(mV)</b> | <b>Std. Dev.</b> |
|------------------------------------------|--------------------------------|------------------|
| 10/90 NP                                 | -14.8                          | 0.8              |
| 50/50 NP                                 | -14.2                          | 0.6              |
| 50/50 NP (Mannose-PEGPLA)                | -9.8                           | 0.4              |
| MeOPEGPLA NP                             | -28                            | 1                |

**Table S4.** MFI Luminex values and corresponding P-values

| Cytokine   | NP 1   | NP 2   | NP 3    | Sol. 1   | Sol. 2   | Sol. 3   | p-value       | FDR Correction <sup>#</sup> (q-value) | Bonferroni Correction <sup>&amp;</sup> (p-value) |
|------------|--------|--------|---------|----------|----------|----------|---------------|---------------------------------------|--------------------------------------------------|
| TGFβ       | 1119   | 516.5  | 657.75  | 1548.25  | 1063.75  | 945.5    | 0.1791        | 0.8737                                | >0.9999                                          |
| IL10       | 51     | 49.5   | 48.5    | 79.5     | 116.5    | 84.75    | 0.0645        | 0.8737                                | >0.9999                                          |
| VEGF       | 79     | 60.75  | 68.5    | 86.25    | 96.75    | 91.25    | <b>0.0226</b> | 0.8737                                | >0.9999                                          |
| LIF        | 38.25  | 40.75  | 49.75   | 54.75    | 54.25    | 72.5     | 0.0645        | 0.8737                                | >0.9999                                          |
| IL6        | 93.25  | 182.25 | 110.5   | 1548.5   | 2797     | 1463     | <b>0.0139</b> | <b>0.0144</b>                         | 0.0984                                           |
| IFNα       | 67.25  | 43.75  | 56.75   | 1287.25  | 2719.75  | 770.5    | 0.0579        | <b>0.0480</b>                         | 0.3817                                           |
| IL9        | 57     | 42.5   | 59.75   | 85.75    | 78.75    | 406      | 0.2734        | 0.8737                                | >0.9999                                          |
| IL12P70    | 58     | 58     | 58.75   | 164.5    | 244.5    | 160.25   | <b>0.0087</b> | 0.8737                                | >0.9999                                          |
| IL15/IL15R | 38     | 44.5   | 36.5    | 92       | 136      | 92       | <b>0.0108</b> | 0.8737                                | >0.9999                                          |
| IFNγ       | 39     | 47     | 37.25   | 76.5     | 100      | 77.5     | <b>0.0061</b> | 0.8737                                | >0.9999                                          |
| GSCF/CSF3  | 72.25  | 63     | 46      | 76.5     | 116.25   | 87.5     | 0.0818        | 0.8737                                | >0.9999                                          |
| IL22       | 37.25  | 33     | 30.25   | 56.75    | 75       | 60       | <b>0.0070</b> | 0.8737                                | >0.9999                                          |
| GMCSF      | 29.75  | 33     | 31.5    | 64.75    | 99       | 71       | <b>0.0114</b> | 0.8737                                | >0.9999                                          |
| IL27       | 28.5   | 32.25  | 28      | 34.5     | 40.75    | 514.75   | 0.3527        | 0.8737                                | >0.9999                                          |
| IL3        | 27.25  | 34.5   | 30.5    | 30       | 39       | 38.5     | 0.2303        | 0.8737                                | >0.9999                                          |
| IL4        | 38.5   | 44     | 42      | 55       | 66.75    | 59.75    | <b>0.0073</b> | 0.8737                                | >0.9999                                          |
| MCSF       | 45.5   | 53     | 48      | 56.25    | 55.5     | 66.25    | 0.0629        | 0.8737                                | >0.9999                                          |
| IL5        | 98     | 107.75 | 53.75   | 204.25   | 232.75   | 198.25   | <b>0.0032</b> | 0.8737                                | >0.9999                                          |
| IL2        | 187.5  | 261.25 | 291.75  | 178.75   | 284.75   | 188.75   | 0.5558        | 0.8737                                | >0.9999                                          |
| MIP1B      | 367.25 | 623.75 | 131.25  | 11759.25 | 16535.75 | 8211.25  | <b>0.0081</b> | <b>&lt;0.0001</b>                     | <b>&lt;0.0001</b>                                |
| MCP3       | 2518   | 2288.5 | 3956    | 12351.75 | 12621.25 | 11008.25 | <b>0.0002</b> | <b>&lt;0.0001</b>                     | <b>&lt;0.0001</b>                                |
| IP10       | 974    | 1001.5 | 830.5   | 9204.5   | 8625.25  | 7510     | <b>0.0001</b> | <b>&lt;0.0001</b>                     | <b>&lt;0.0001</b>                                |
| MCP1       | 138.25 | 453.5  | 134.5   | 8219.25  | 13884.5  | 7932     | <b>0.0073</b> | <b>&lt;0.0001</b>                     | <b>&lt;0.0001</b>                                |
| GROA       | 127.5  | 511.5  | 662.25  | 3052     | 2490.5   | 1847.75  | <b>0.0061</b> | <b>0.0051</b>                         | <b>0.0287</b>                                    |
| EOTAXIN    | 3291.5 | 1456   | 5327.75 | 5348.5   | 3325.5   | 4960.75  | 0.4059        | 0.1898                                | >0.9999                                          |
| MIP1A      | 87.5   | 132.5  | 85.25   | 798      | 1423.25  | 629      | <b>0.0248</b> | 0.4998                                | >0.9999                                          |
| RANTES     | 309.5  | 261.5  | 307.25  | 1244     | 1706.25  | 898.75   | <b>0.0134</b> | 0.3478                                | >0.9999                                          |
| MIP2       | 120.5  | 107.75 | 113.5   | 150      | 141.5    | 132.25   | <b>0.0124</b> | 0.8737                                | >0.9999                                          |
| LIX        | 240    | 272.25 | 407.5   | 773.75   | 612.5    | 802.25   | <b>0.0057</b> | 0.8737                                | >0.9999                                          |
| TNFα       | 71     | 150.5  | 79.5    | 738.5    | 1005.75  | 469      | <b>0.0153</b> | 0.8370                                | >0.9999                                          |
| IL18       | 47.75  | 67     | 50.75   | 189.5    | 303      | 205.75   | <b>0.0078</b> | 0.8737                                | >0.9999                                          |
| IL17A      | 27.75  | 35     | 24.5    | 158.25   | 254.25   | 116      | <b>0.0231</b> | 0.8737                                | >0.9999                                          |
| IL13       | 46     | 47.75  | 51.25   | 107.5    | 111.5    | 91       | <b>0.0010</b> | 0.8737                                | >0.9999                                          |
| IL31       | 35     | 49.5   | 38.25   | 191      | 309.5    | 168      | <b>0.0145</b> | 0.8737                                | >0.9999                                          |
| IL1A       | 45     | 48     | 44.75   | 65.5     | 77       | 64       | 0.0057        | 0.8737                                | >0.9999                                          |
| IL23       | 38.5   | 35     | 33.5    | 48       | 52.5     | 52       | <b>0.0018</b> | 0.8737                                | >0.9999                                          |
| IL1B       | 25.5   | 24.25  | 21.25   | 35.5     | 42.5     | 39.75    | <b>0.0029</b> | 0.8737                                | >0.9999                                          |

<sup>#</sup>Two-stage step-up method of Benjamini, Krieger and Yekutieli on Prism

<sup>&</sup>Multiple comparisons with Bonferroni method on Prism

## References.

1. Shukla, N.M., Mutz, C.A., Ukani, R., Warshakoon, H.J., Moore, D.S., and David, S.A. (2010). Syntheses of fluorescent imidazoquinoline conjugates as probes of Toll-like receptor 7. *Bioorg Med Chem Lett* *20*, 6384-6386.
2. Kandalkar, S.R., Kaduskar, R.D., Ramaiah, P., Barawkar, D.A., Bhuniya, D., and Deshpande, A.M. (2013). Highly efficient one-pot amination of carboxylate-substituted nitrogen-containing heteroaryl chlorides via Staudinger reaction. *Tetrahedron Lett.* *54*, 414-418.
3. Daly, R., Vaz, G., Davies, A.M., Senge, M.O., and Scanlan, E.M. (2012). Synthesis and Biological Evaluation of a Library of Glycoporphyrin Compounds. *Chem. Eur. J.* *18*, 14671-14679.
4. Appel, E.A., Tibbitt, M.W., Webber, M.J., Mattix, B.A., Veiseh, O., and Langer, R. (2015). Self-assembled hydrogels utilizing polymer-nanoparticle interactions. *Nat. Commun.* *6*, e6295.
